# Supplementary material for: Functionalized carbon nanotubes as transporters for antisense oligodeoxynucleotides
Source: Royal Society of Chemistry journal article supplement (doi:10.1039/c4tb00915k), 2014-08-18
Supplement: c4tb00915k1.pdf [file c4tb00915k1.pdf]

## aSupporting Information of

### Functionalized carbon nanotubes as transporters for antisense oligodeoxynucleotides

Anika Kaufmann,<sup>a,\*</sup> David Kunhardt,<sup>b</sup> Giuseppe Cirillo,<sup>b,c</sup> Silke Hampel,<sup>b</sup> Bernd Schwenzer.<sup>a</sup>

<sup>a</sup> Chair of Biochemistry, Department of chemistry, Technische Universität Dresden, Bergstraße 66, D-01069 Dresden, Germany. Email: Anika.Kaufmann@chemie.tu-dresden.de.

<sup>b</sup> Leibniz-Institut für Solid State and Materials Research Dresden, Helmholtzstraße 20, D-01069 Dresden, Germany.

<sup>c</sup> Department of Pharmacy, Health and Nutritional Sciences, University of Calabria, Edificio Polifunzionale, I-87036 Rende (CS), Italy.

**Tab. S1.** Elemental distribution (%) of p-MWCNT and MWCNT-f-OH measured by XPS.

|                   | <b>C</b> | <b>N</b> | <b>O</b> |
|-------------------|----------|----------|----------|
| <b>p-MWCNT</b>    | 98,2     | 0        | 1,8      |
| <b>MWCNT-f-OH</b> | 89,5     | 3,2      | 7,3      |

**Tab. S2.** Design of synthetic oligodeoxynucleotides<sup>23</sup> which were additionally used for cell culture experiments whereas NS-K1 is used as nonsense control.

| <b>Type</b>     | <b>sequence</b>                  |
|-----------------|----------------------------------|
| <b>NS-K1</b>    | 5'-GTA AGC TGT TCT ATG TGT TC-3' |
| <b>VEGF-857</b> | 5'-AGG GAC CGT GCT GGG TCA CC-3' |
| <b>VEGF-859</b> | 5'-AGA GGG ACC GTG CTG GGT CA-3' |

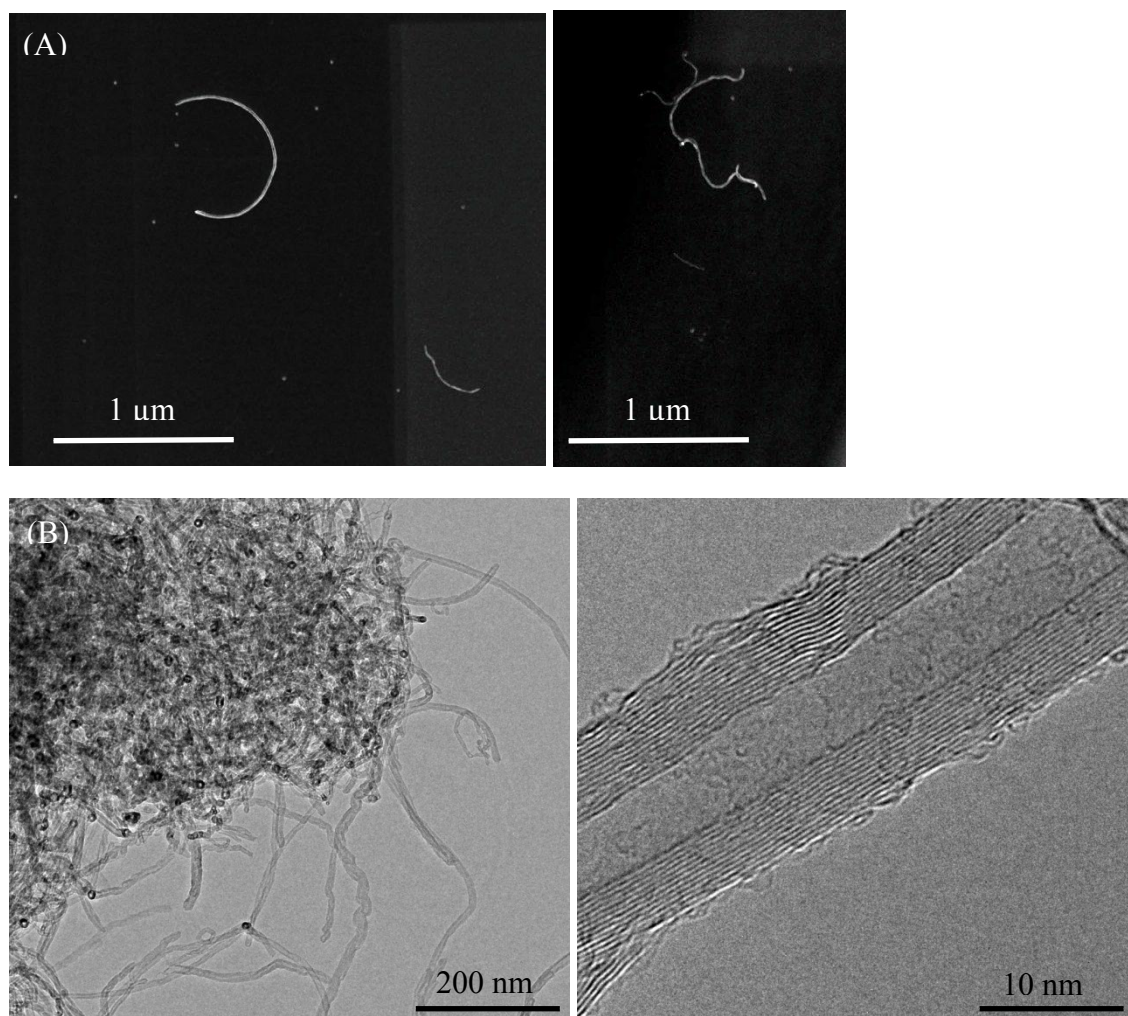

**Fig.S1.** Morphology of p-MWCNTs analyzed by SEM (A) and TEM (B).

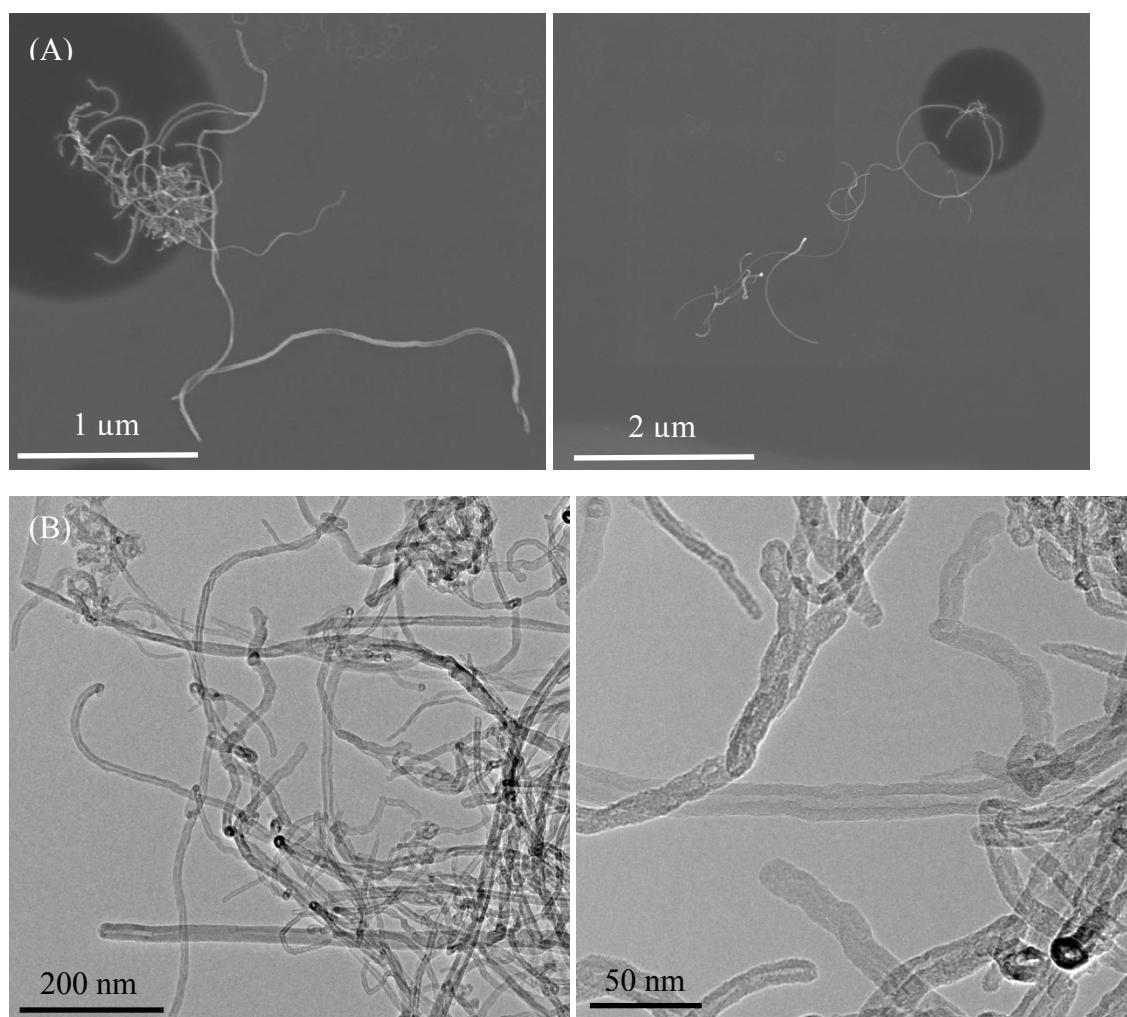

**Fig.S2.** Morphology of MWCNT-f-OH analyzed by SEM (A) and TEM (B).

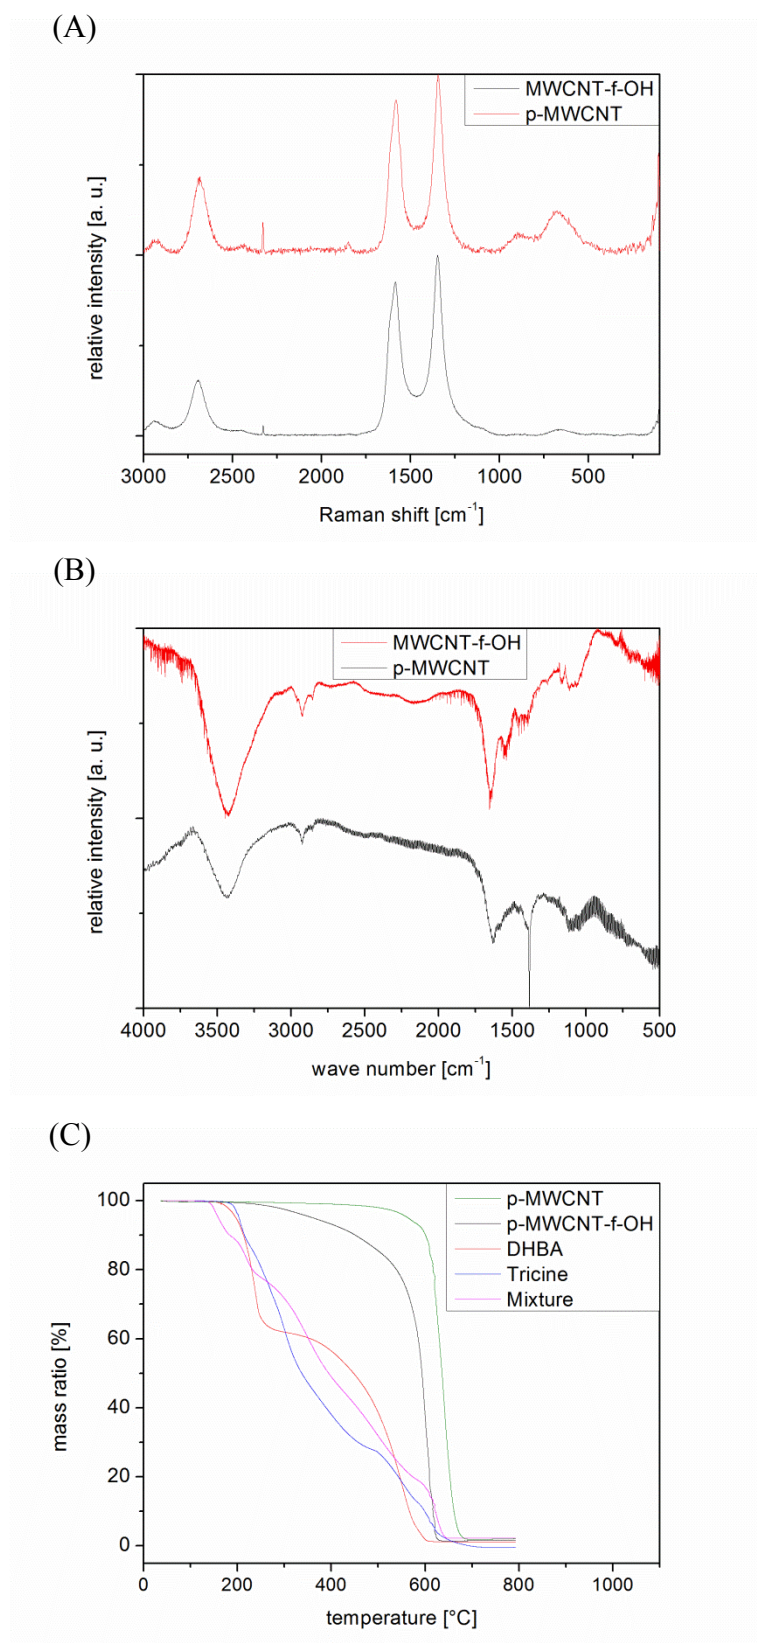

**Fig. S3.** Characterization of p-MWCNT and MWCNT-f-OH (A) Raman spectra; (B) IR-spectra; (C) TGA curves of p-MWCNT, MWCNT-f-OH, DHBA, tricine and a 2:2.7:3.5 mixture of the reactants.

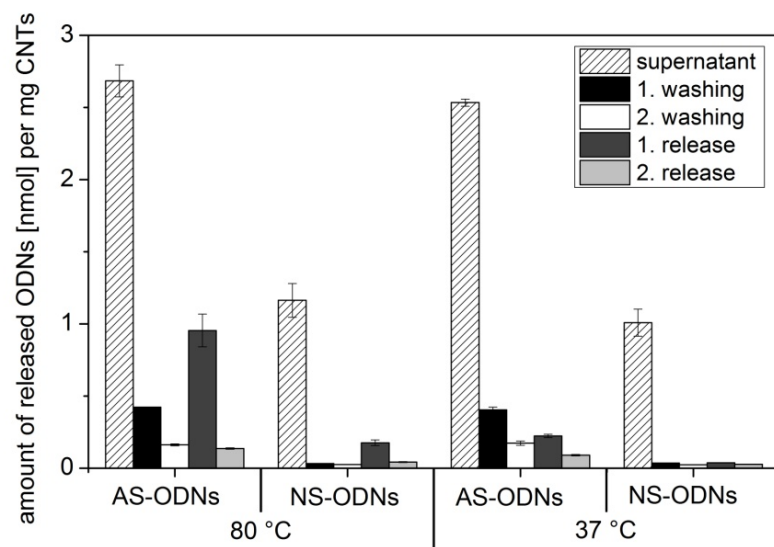

**Fig. S4.** Hybridization of AS-ODNs and NS-ODNs to MWCNT-f-OH ( $t = 30$  min,  $c$  (ODN) =  $0.5 \mu\text{M}$ ) followed by a release at  $37^\circ\text{C}$  and  $80^\circ\text{C}$  measured by fluorescence labeling.

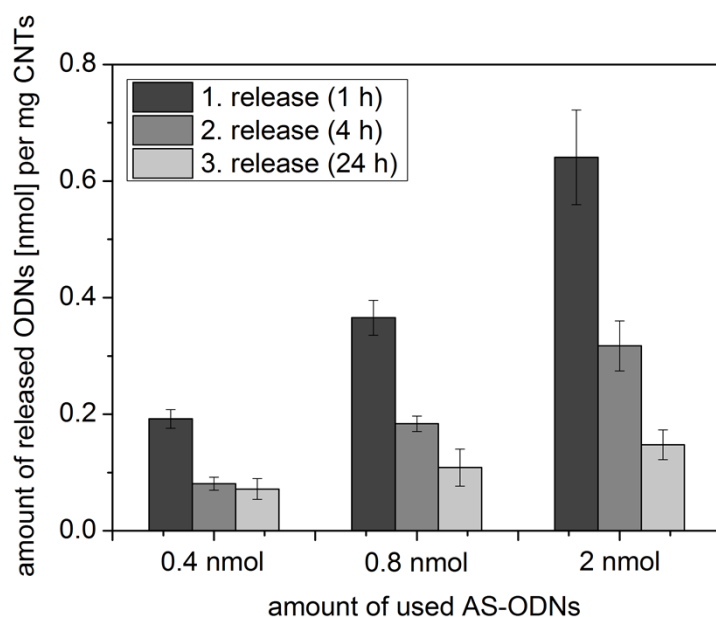

**Fig. S5.** Release of AS-ODNs in cytosol extract (protein content =  $1 \text{ mg/ml}$ ) after adsorption to MWCNT-f-OH followed by a release at  $37^\circ\text{C}$  measured by fluorescence labeling.

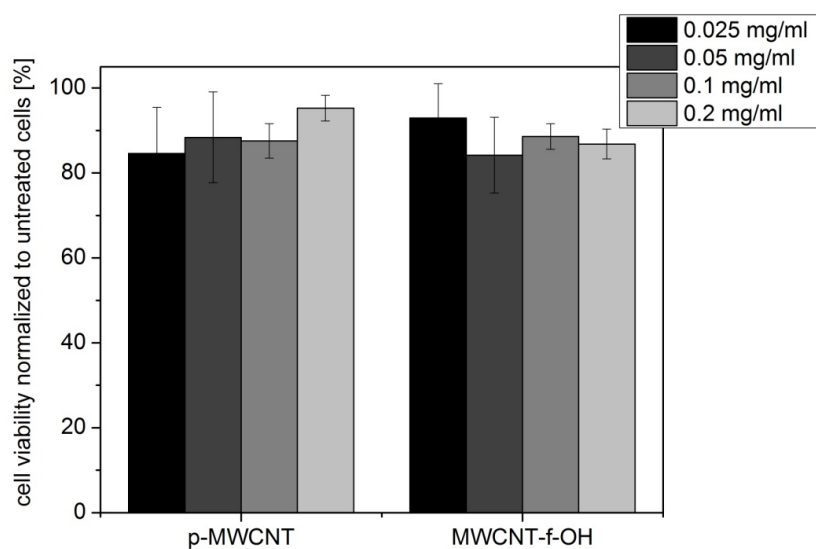

**Fig. S6.** Cellular viability of EJ28 after 24 h treatment with different concentrations of p-MWCNT and MWCNT-f-OH measured by WST-1 assay after 96 h (normalized to untreated cells).

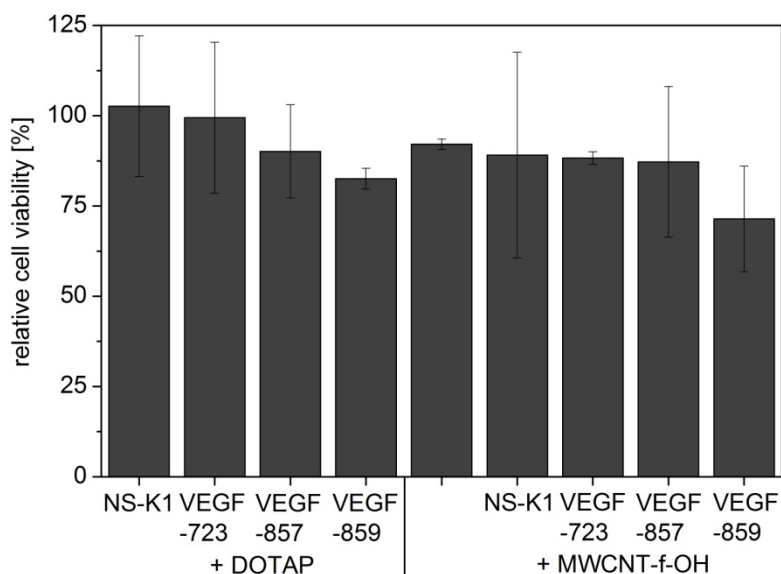

**Fig. S7.** Cellular viability of EJ28 after 4 h transfection with 0.5 μM AS-ODNs with DOTAP or with 0.1 mg/ml MWCNT-f-OH measured by WST-1 assay after 72 h (normalized to untreated cells).

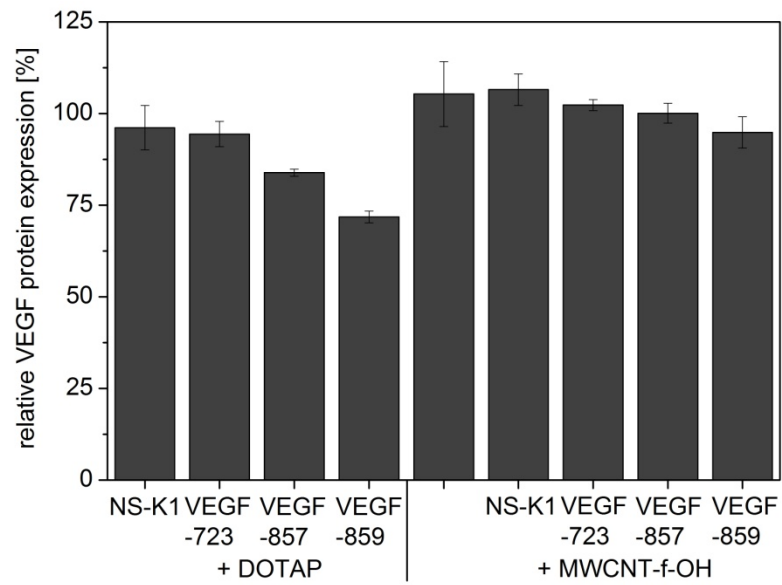

**Fig. S8.** VEGF protein expression of EJ28 after 4 h transfection with 0.5  $\mu$ M AS-ODNs with DOTAP or with 0,1 mg/ml MWCNT-f-OH measured by VEGF-specific ELISA after 72 h (normalized to untreated cells).
